# Supplementary material for: Phenotypic Complexity, Measurement Bias, and Poor Phenotypic Resolution Contribute to the Missing Heritability Problem in Genetic Association Studies
Source: PLoS One. 2010 Nov 10;5(11):e13929. doi: 10.1371/journal.pone.0013929 (PMC2978099; doi:10.1371/journal.pone.0013929)
Supplement: Table S4 — 3-factor model with effect genetic variant equally strong on all three factors. (0.05 MB DOC) [file pone.0013929.s010.doc]

**Supplemental Data**

**Supplement to**

“Phenotypic complexity, measurement bias, and poor phenotypic resolution contribute to the missing heritability problem in genetic association studies”

Sophie van der Sluis

Matthijs Verhage

Danielle Posthuma

Conor V. Dolan

| Table S4: violations of unidimensionality. 2 factor model with a genetic variant affecting both factors equally | | | | | | |
| --- | --- | --- | --- | --- | --- | --- |
|  |  |  |  |  |  |  |
|  | **cor[3,1/2]=.2** | | | **cor[3,1/2]=.6** | | |
|  | **χ2(1)** | **Obs power N=1200** | **N required for power of 80%** | **χ2(1)** | **Obs power N=1200** | **N required for power of 80%** |
| **P=.5** |  |  |  |  |  |  |
| Sum | 18.177 | .99 | 518 | 14.351 | .97 | 656 |
| True | 18.194 | .99 | 518 | 14.486 | .97 | 650 |
| **P=.3** |  |  |  |  |  |  |
| Sum | 15.285 | .97 | 616 | 12.065 | .93 | 781 |
| True | 15.299 | .97 | 616 | 12.180 | .94 | 773 |
|  |  |  |  |  |  |  |
| Note: cor[3,1/2] denotes the correlation between the third factor, and the first and second factor. The correlation between the first two factors was fixed to .3. P denotes the frequency of the first allele of the diallelic GV. χ2(1) denotes the increase in likelihood when the regression between the GV and the trait is fixed to 0 (a 1-df test). N denotes the sample size required for a power of 80% when α=.05. | | | | | | |
